# Supplementary material
Source: Springer Nature journal article supplement (https://www.springermedizin.de/resource/supplementary/12958_2012_990_MOESM5_ESM.pdf/9566516)

# A

## CHIP assay

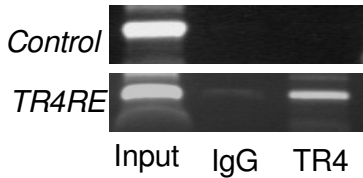

# B

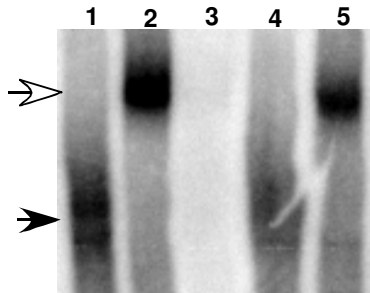

|        |   |   |   |   |   |
|--------|---|---|---|---|---|
| TR4    | + | + | + | + | + |
| TR4Ab  | - | + | - | - | + |
| TR4RE  | - | - | + | - | - |
| TR4REm | - | - | - | + | + |

Supplement: MOESM5 [file 9566516]
